# Supplementary material for: Two polymolybdate-based complexes and their graphene composites with visible-light photo-responses
Source: Royal Society of Chemistry journal article supplement (doi:10.1039/c6ra19805h), 2016-01-01
Supplement: c6ra19805h1.pdf [file c6ra19805h1.pdf]

# Two Polymolybdate-Based Complexes and Their Graphene Composites with Visible-Light Photo-Responses

Hai-Qiang Luo,<sup>a</sup> Pan Zhang,<sup>a</sup> Yong-Xi Yang,<sup>a</sup> Yun Gong<sup>\*a</sup> and Jian-Hua Lin<sup>\*a, b</sup>

<sup>a</sup> Department of Applied Chemistry, College of Chemistry and Chemical Engineering, Chongqing University, Chongqing 400030, P. R. China. Tel: +86-023-65106150 E-mail: gongyun7211@cqu.edu.cn

<sup>b</sup> State Key Laboratory of Rare Earth Materials Chemistry and Applications, College of Chemistry and Molecular Engineering, Peking University, Beijing 100871, P. R. China Tel: +86-010-62753541 E-mail: jhlin@pku.edu.cn

**Table S1** Selected bond lengths (Å) and angles (°) for complexes **1** and **2**

| <i>Complex 1</i>  |          |                    |          |
|-------------------|----------|--------------------|----------|
| Mo(1)-O(6)        | 1.67(17) | Mo(1)-O(1)         | 2.34(14) |
| Mo(2)-O(10)       | 1.69(15) | Mo(2)-O(1)         | 2.35(14) |
| Mo(3)-O(12)       | 1.70(13) | Mo(3)-O(11)        | 2.33(14) |
| Mo(4)-O(13)       | 1.78(19) | Mo(4)-O(2)         | 2.47(15) |
| O(2)-Mo(1)-O(1)   | 73(5)    | O(5)-Mo(1)-O(1)    | 165(6)   |
| O(7)-Mo(2)-O(1)   | 68(6)    | O(8)-Mo(2)-O(3)    | 160(4)   |
| O(4)-Mo(3)-O(2)   | 71(8)    | O(8)#1-Mo(3)-O(11) | 173(5)   |
| O(2)#2-Mo(4)-O(7) | 73(8)    | O(13)-Mo(4)-O(2)   | 178(6)   |
| <i>Complex 2</i>  |          |                    |          |
| Mo(1)-O(5)        | 1.693(3) | Mo(1)-O(1)         | 2.209(3) |
| Mo(1)-N(2)        | 2.428(4) | Mo(2)-O(8)         | 1.699(3) |
| Mo(2)-O(1)        | 2.203(3) | Mo(2)-N(8)         | 2.456(4) |

|                    |           |                    |            |
|--------------------|-----------|--------------------|------------|
| Mo(3)-O(9)         | 1.698(3)  | Mo(3)-O(6)         | 2.224(3)   |
| Mo(4)-O(11)        | 1.703(4)  | Mo(4)-O(13)        | 1.9230(16) |
| Mo(4)-N(3)         | 2.322(4)  | Mo(4)-N(4)#3       | 2.443(4)   |
| O(2)-Mo(1)-O(1)    | 72.90(12) | O(5)-Mo(1)-O(1)    | 162.19(15) |
| O(3)-Mo(1)-N(2)    | 78.32(14) | O(4)-Mo(1)-N(2)    | 176.00(15) |
| O(6)-Mo(2)-O(1)    | 72.97(11) | O(8)-Mo(2)-O(1)    | 156.47(14) |
| O(6)-Mo(2)-N(8)    | 74.00(12) | O(7)-Mo(2)-N(8)    | 170.99(15) |
| O(6)#4-Mo(3)-O(6)  | 71.84(13) | O(9)-Mo(3)-O(6)    | 155.72(15) |
| O(11)-Mo(4)-O(13)  | 99.08(14) | O(3)-Mo(4)-O(13)   | 145.40(16) |
| O(13)-Mo(4)-N(4)#3 | 76.13(13) | O(11)-Mo(4)-N(4)#3 | 167.12(16) |
| O(11)-Mo(4)-N(3)   | 90.48(17) | N(3)-Mo(4)-N(4)#3  | 76.77(13)  |

Symmetry transformations used to generate equivalent atoms:

#1  $x-1,y,z$       #2  $-x+1,-y+1,-z+1$       #3  $-x+1,y,-z+1/2$       #4  $-x+3/2,-y+3/2,-z+1$

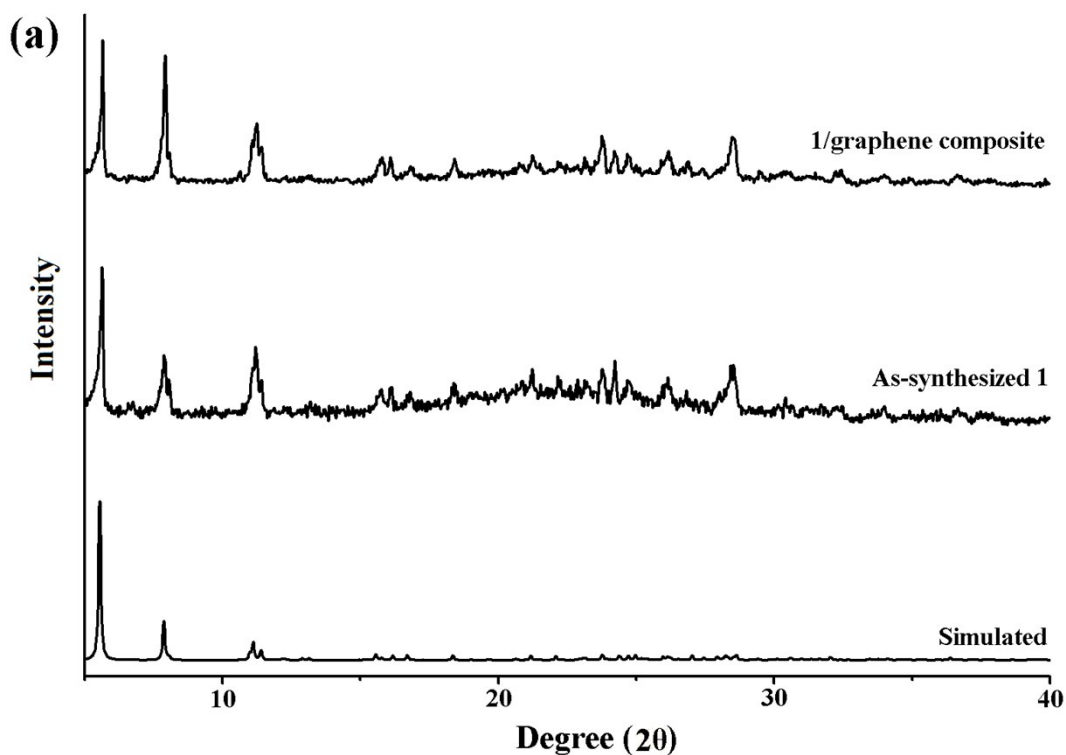

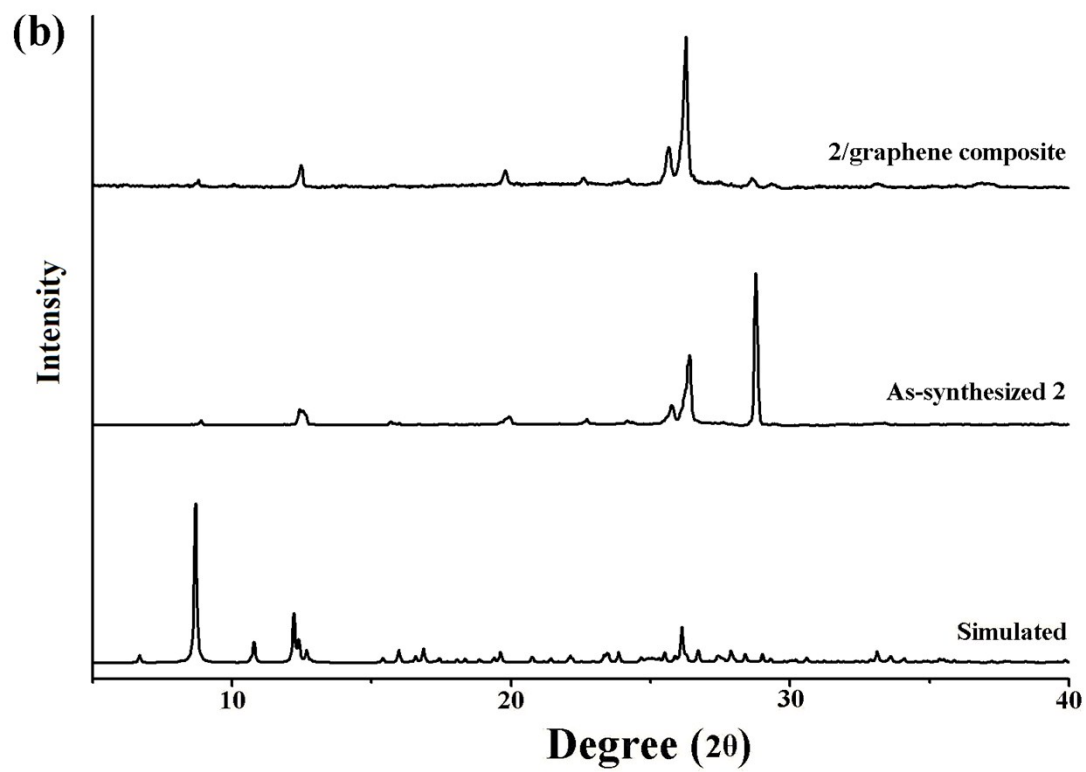

**Fig. S1** The PXRD patterns of complexes **1**, **1/graphene composite** (a), **2** and **2/graphene composite** (b).

**(a)**

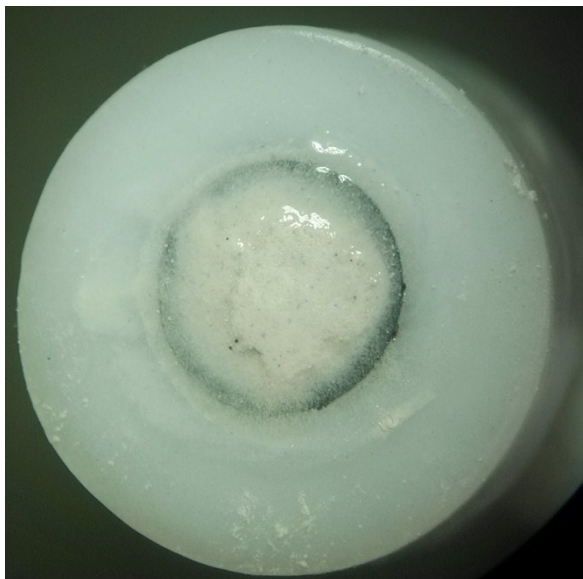

**(b)**

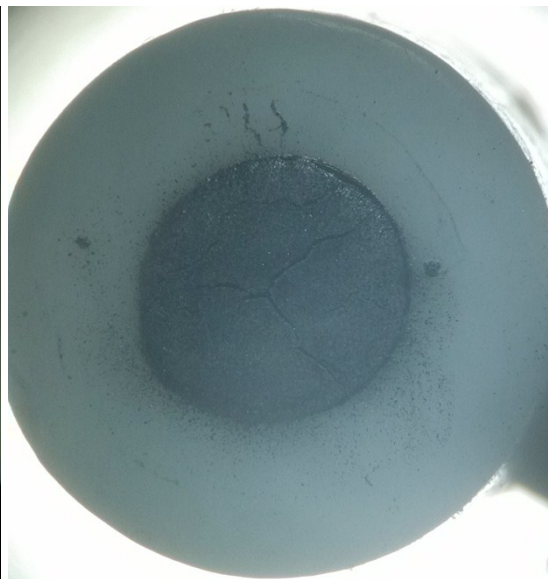

**(c)**

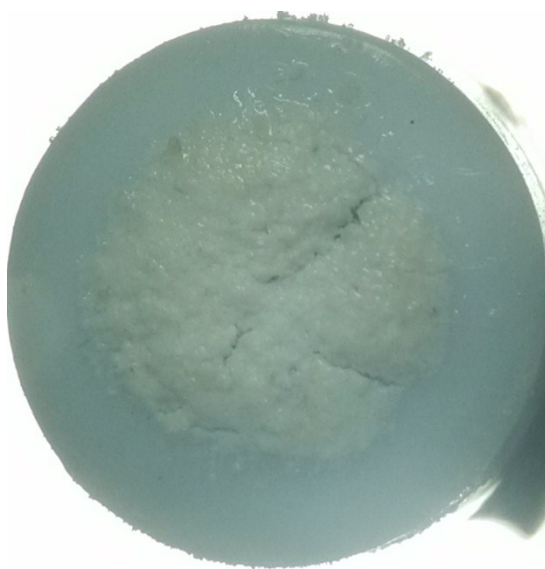

**(d)**

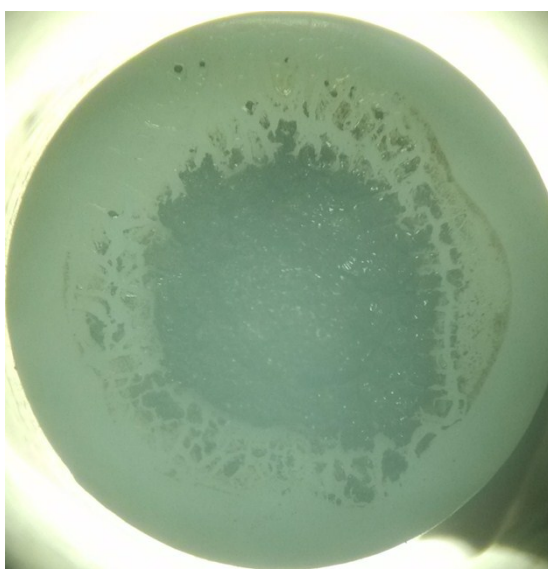

**Fig. S2** The optic micrograms (40-fold magnified) of **1-GCE** (a), **1/graphene-GCE** (b), **2-GCE** (c) and **2/graphene-GCE** (d).

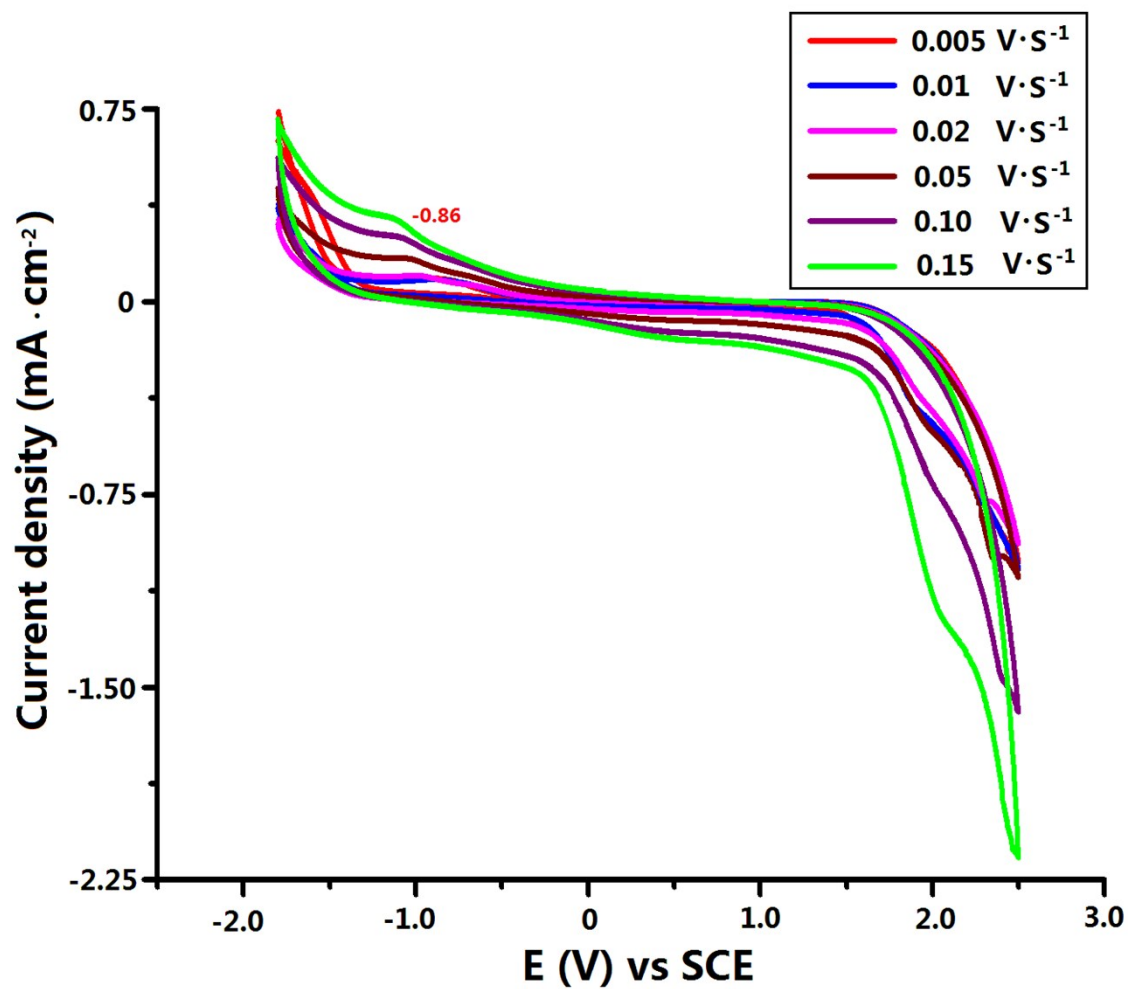

**Fig. S3** CVs of the bare GCE in a 0.4 M acetic acid- sodium acetate buffer solution (pH = 4.5, 50 mL) in the potential range from -1.8 to 2.5 V vs SCE at different sweep rates.

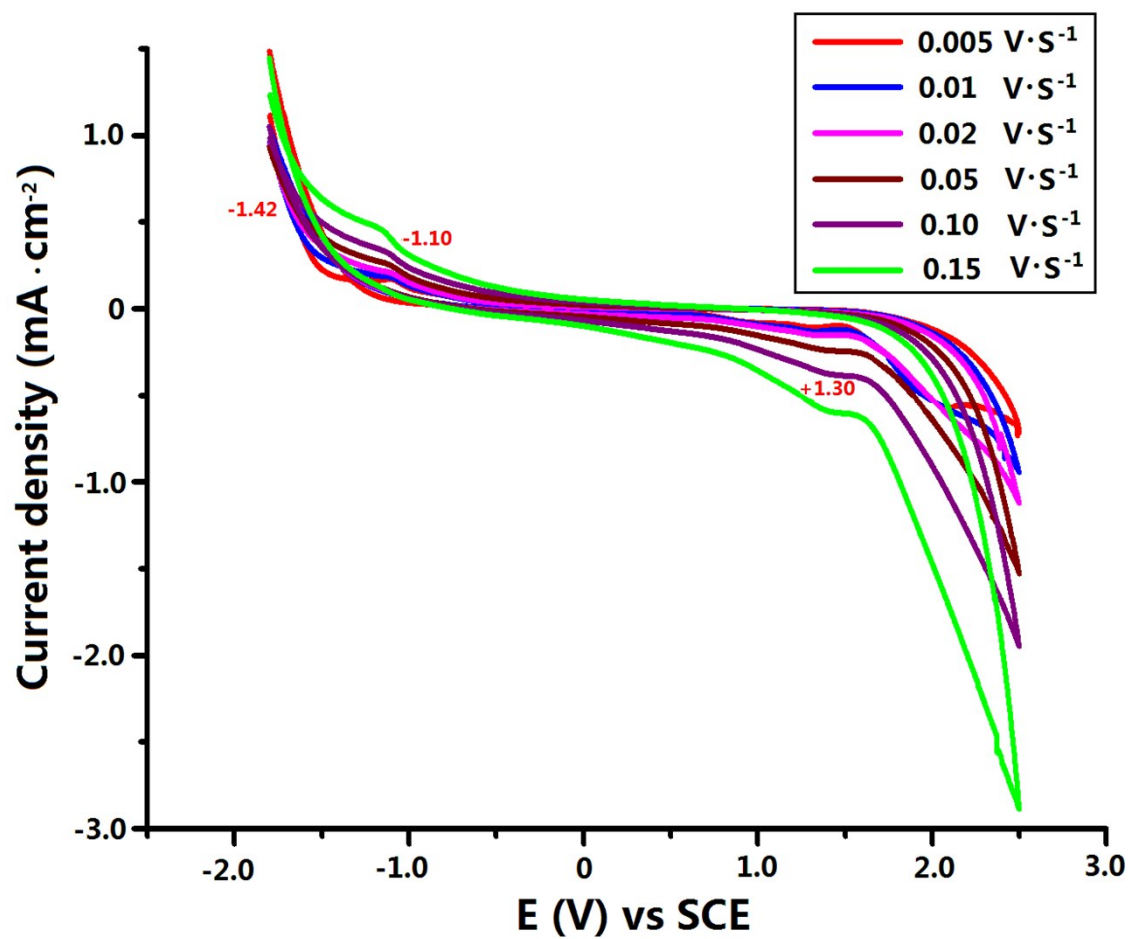

**Fig. S4** CVs of **L1-GCE** in a 0.4 M acetic acid- sodium acetate buffer solution (pH = 4.5, 50 mL) in the potential range from -1.8 to 2.5 V vs SCE at different sweep rates.

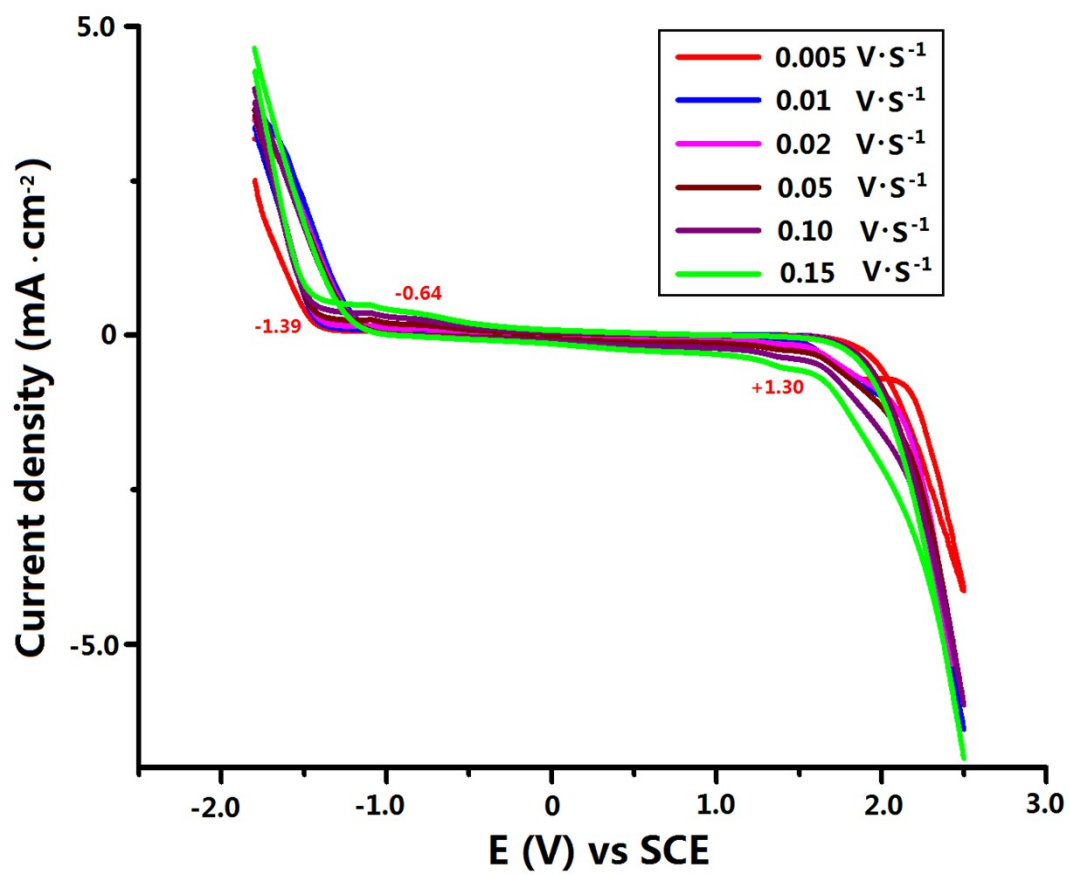

**Fig. S5** CVs of **1-GCE** in a 0.4 M acetic acid- sodium acetate buffer solution (pH = 4.5, 50 mL) in the potential range from -1.8 to 2.5 V vs SCE at different sweep rates.

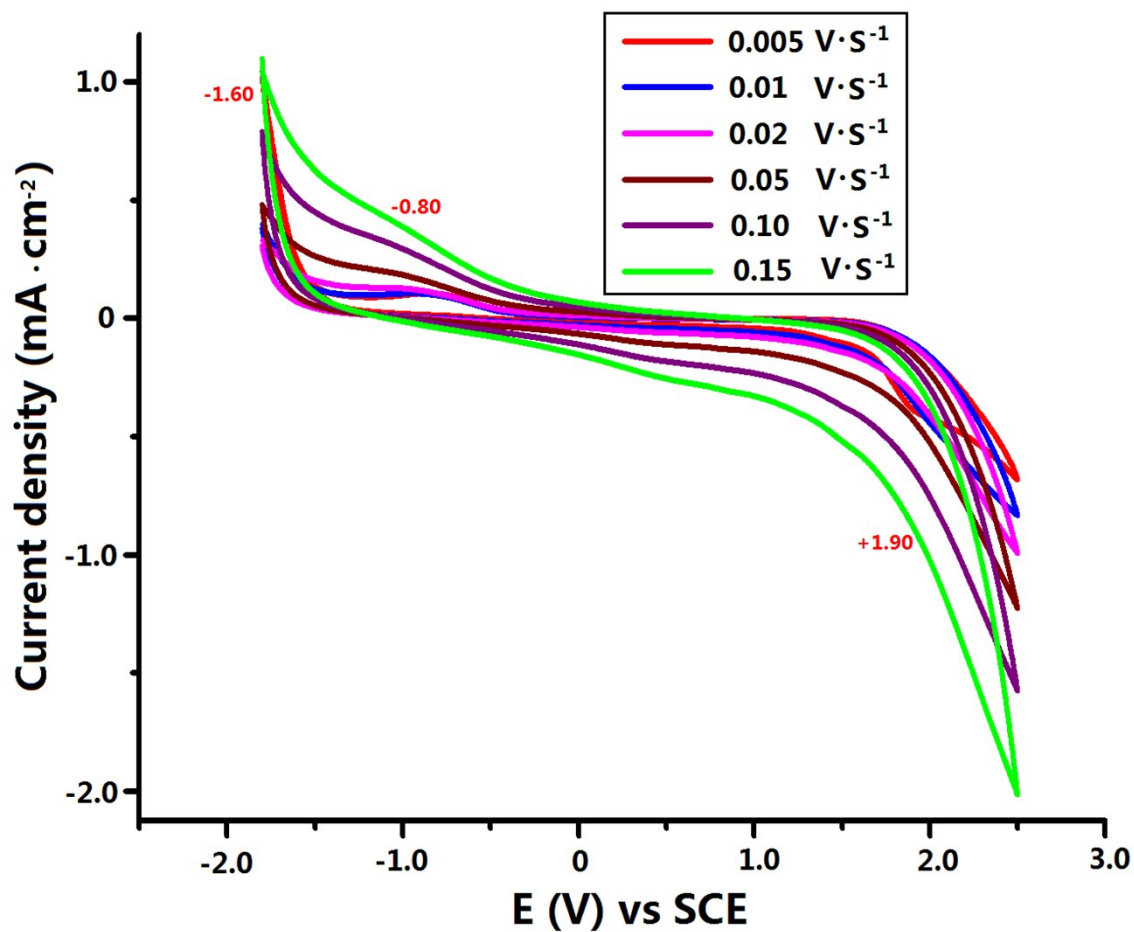

**Fig. S6** CVs of L2-GCE in a 0.4 M acetic acid- sodium acetate buffer solution (pH = 4.5, 50 mL) in the potential range from -1.8 to 2.5 V vs SCE at different sweep rates.

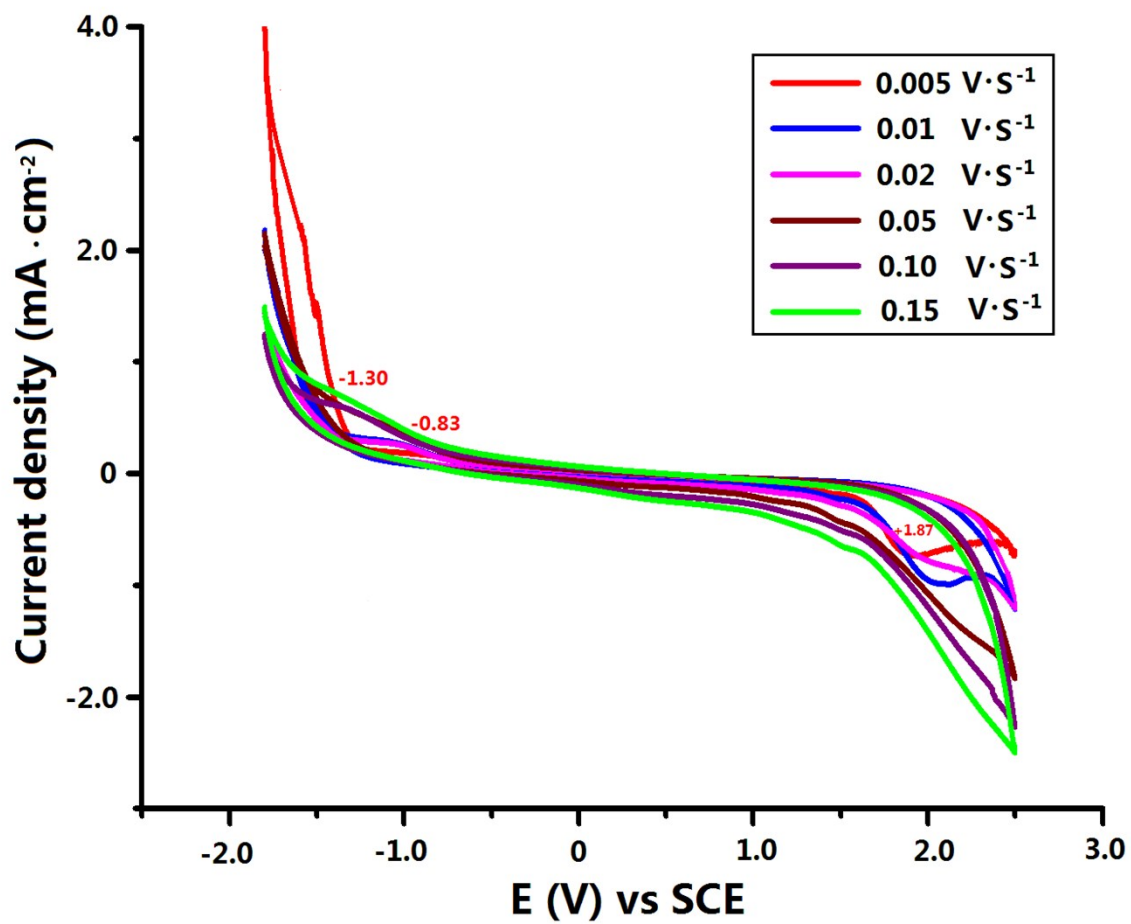

**Fig. S7** CVs of 2-GCE in a 0.4 M acetic acid- sodium acetate buffer solution (pH = 4.5, 50 mL) in the potential range from -1.8 to 2.5 V vs SCE at different sweep rates.

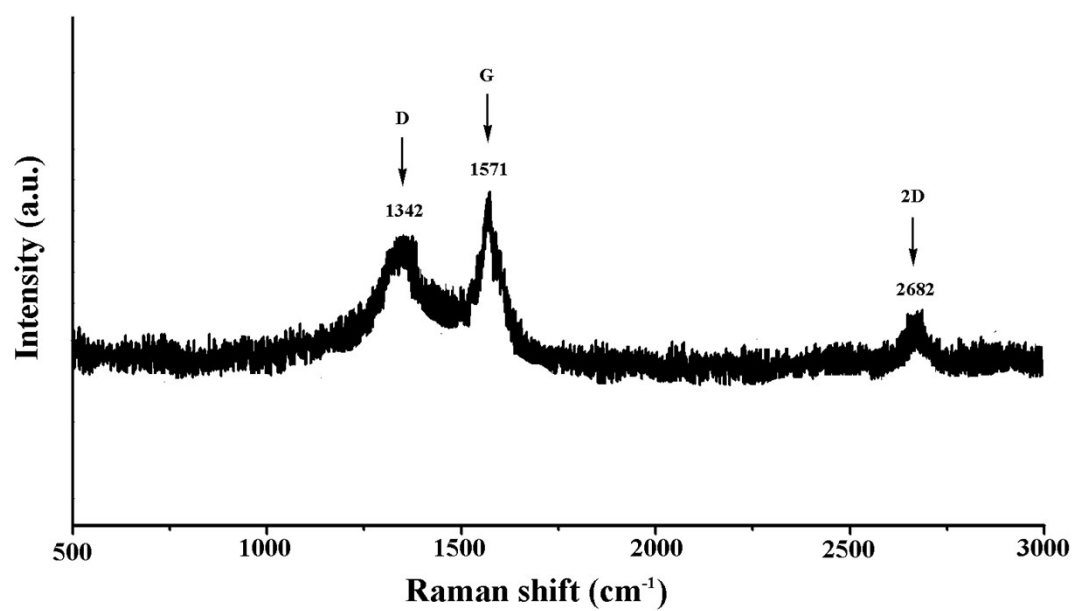

**Fig. S8** Raman spectrum ( $\lambda_{\text{ex}} = 514.5$  nm, 0.4 mW) of the graphene.

(a)

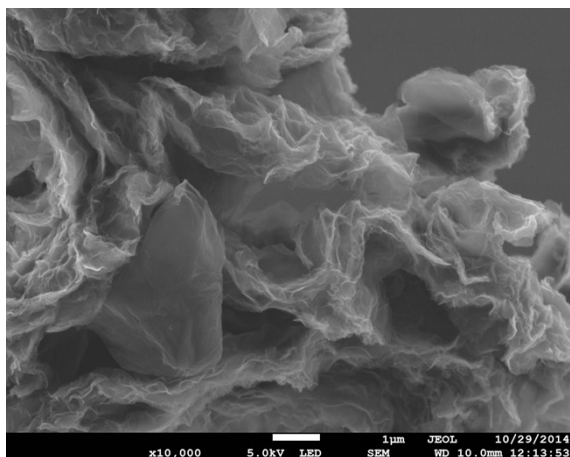

(b)

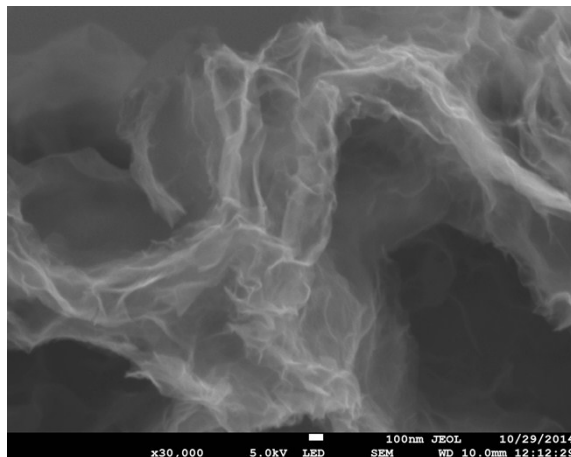

(c)

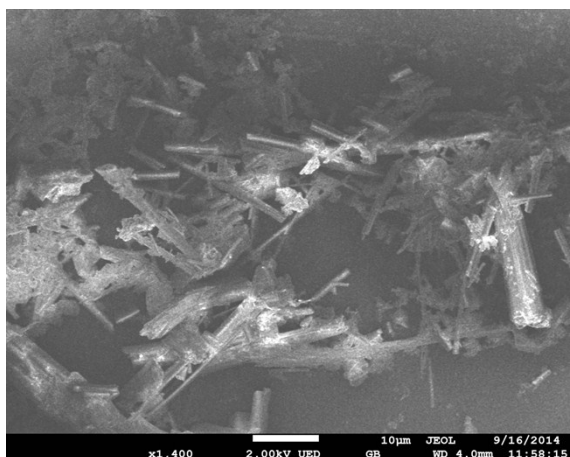

(d)

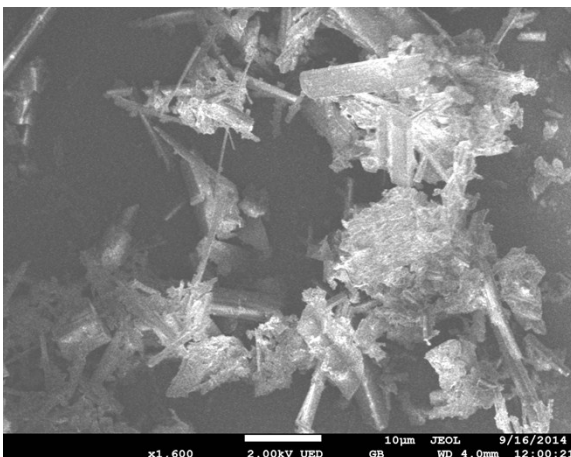

(e)

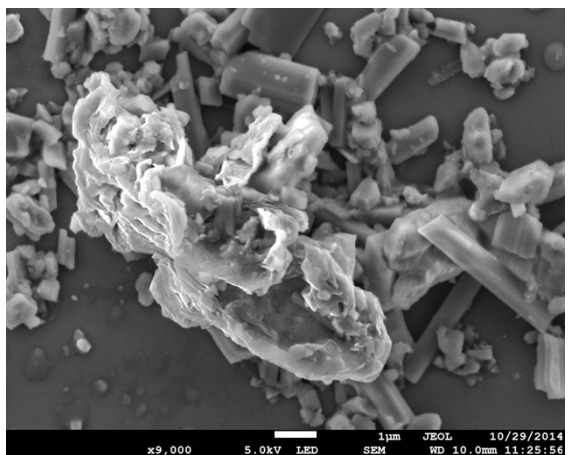

(f)

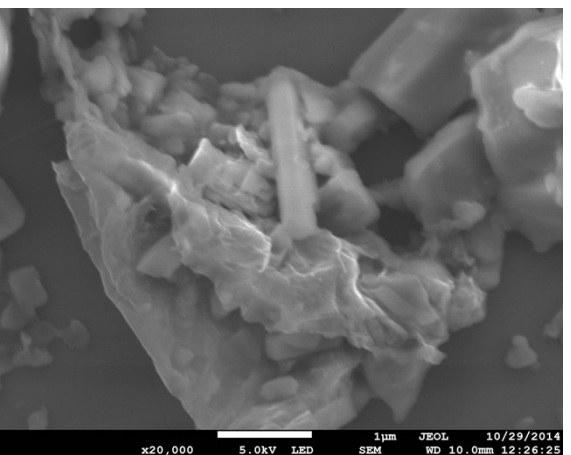

(g)

(h)

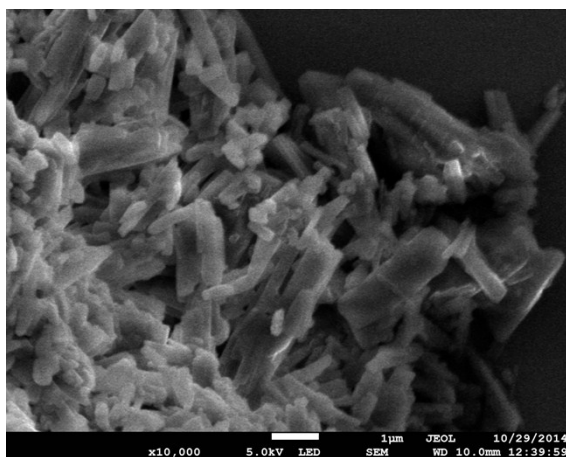

(i)

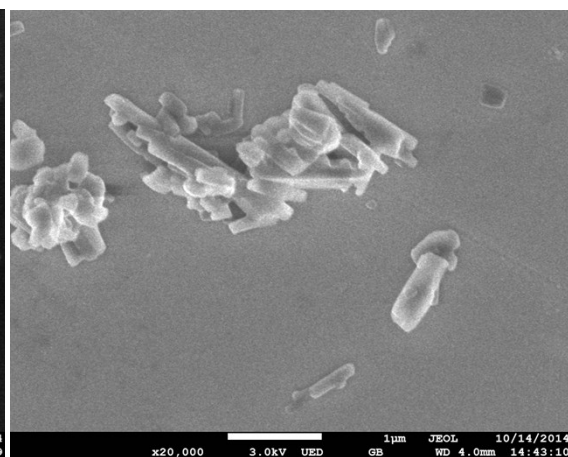

(j)

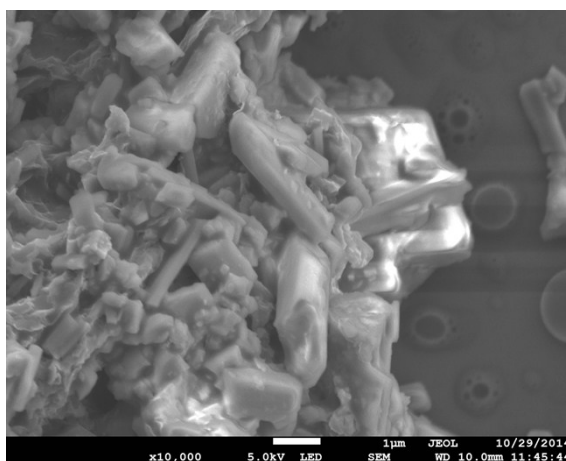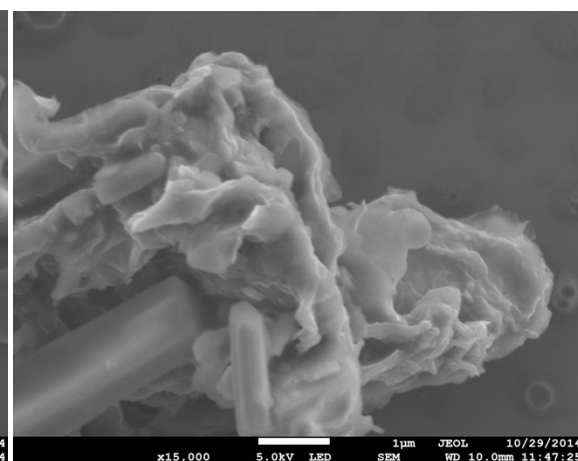

**Fig. S9** The SEM images of the graphene (a, b), complex 1 (c, d), 1/graphene composite (e, f), complex 2 (g, h) and 2/graphene composite (i, j).

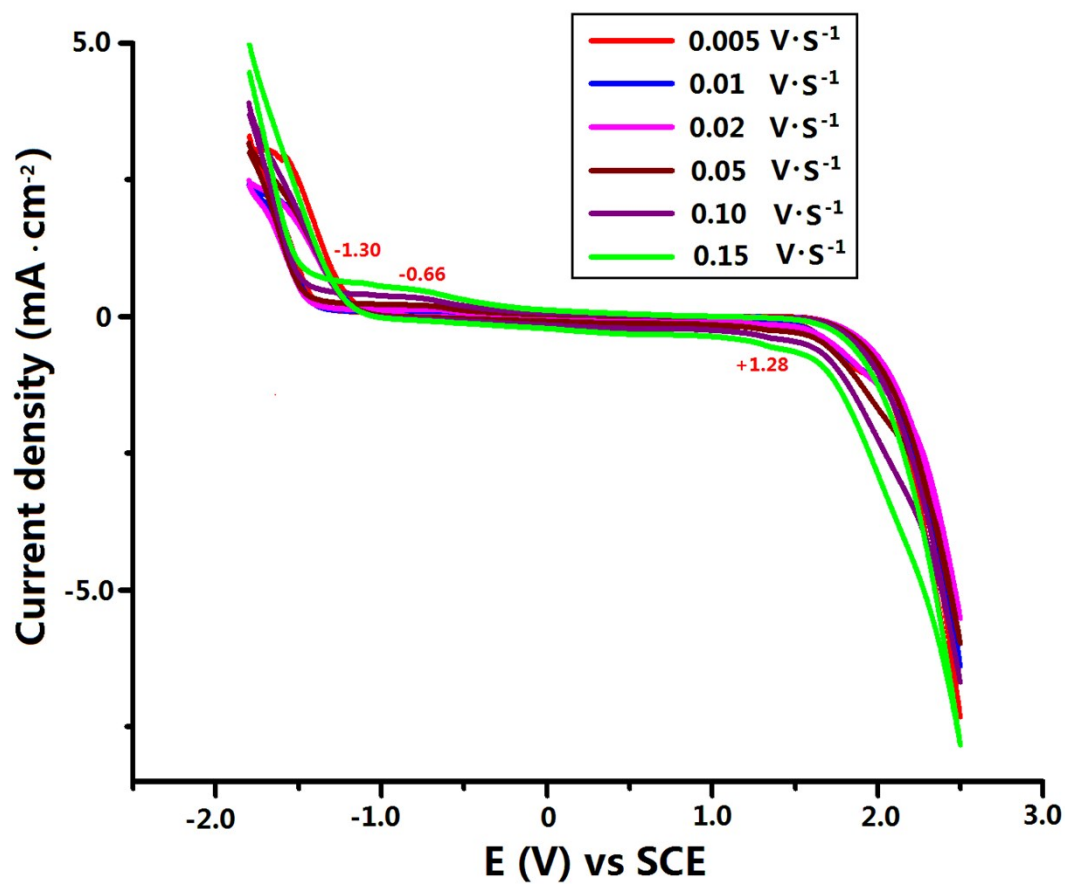

**Fig. S10** CVs of 1/graphene-GCE in a 0.4 M acetic acid- sodium acetate buffer solution (pH = 4.5, 50 mL) in the potential range from -1.8 to 2.5 V vs SCE at different sweep rates.

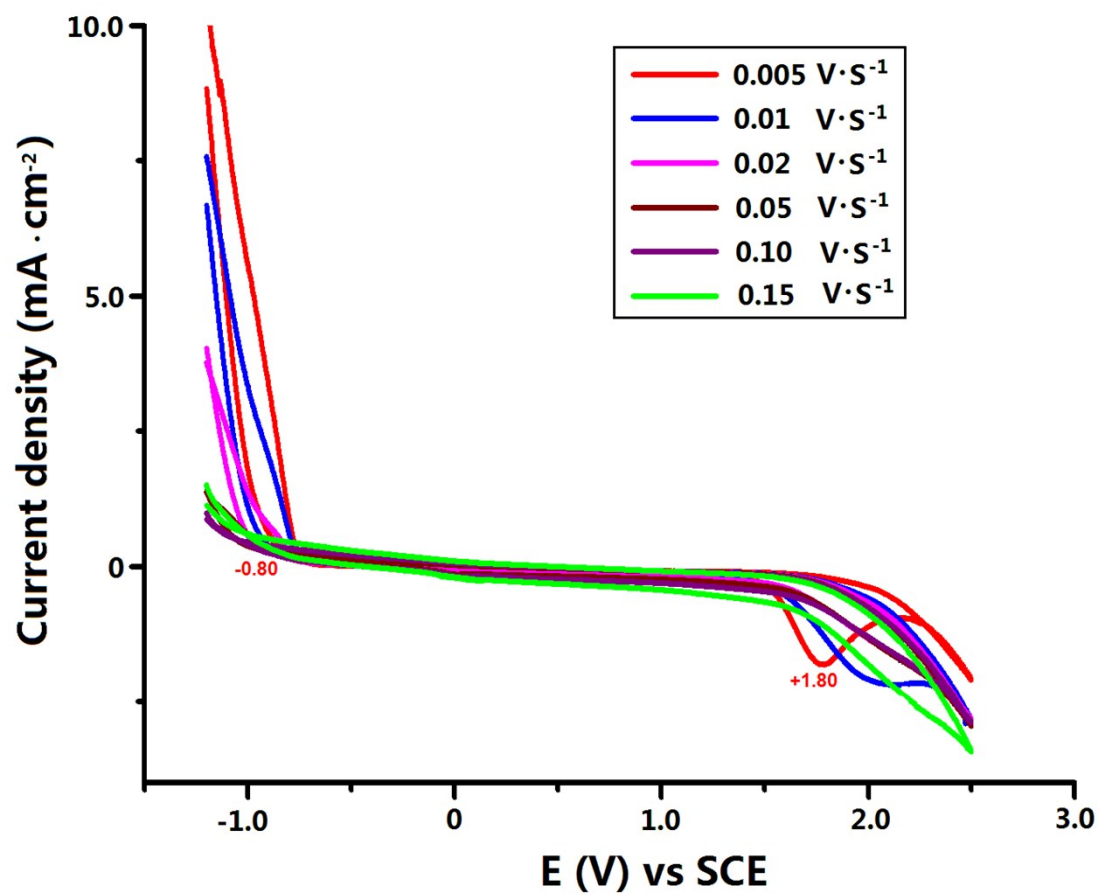

**Fig. S11** CVs of 2/graphene-GCE in a 0.4 M acetic acid- sodium acetate buffer solution (pH = 4.5, 50 mL) in the potential range from -1.2 to 2.5 V vs SCE at different sweep rates.

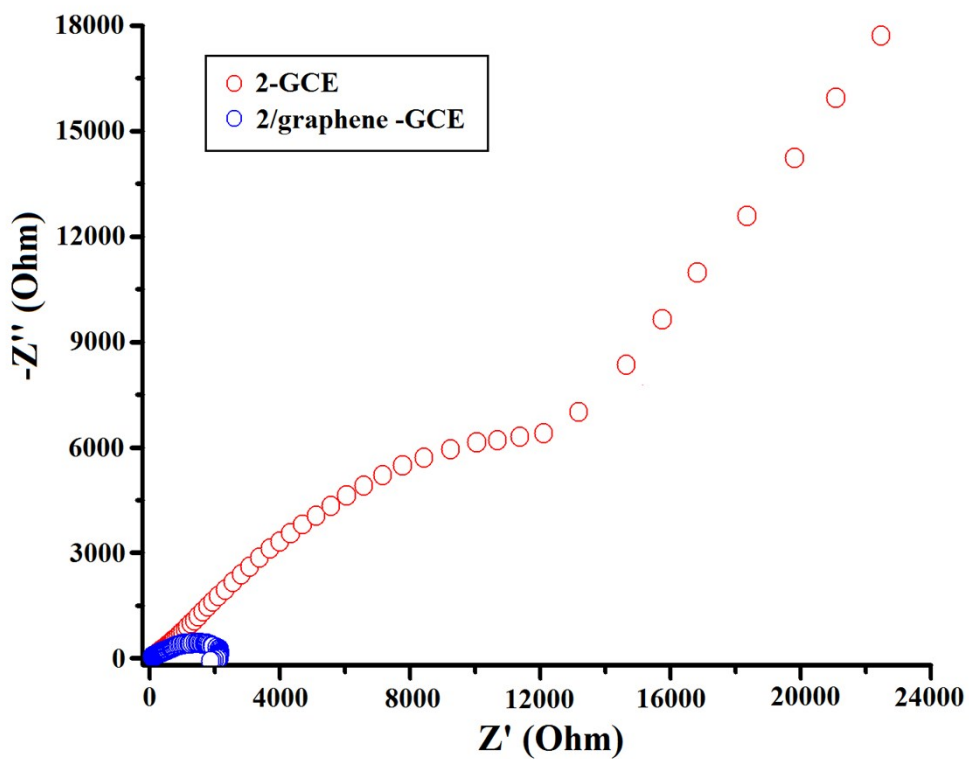

**Fig. S12** Nyquist plots ( $Z'$  vs.  $-Z''$ ) of the three-electrode systems in 0.4 M acetic acid-sodium acetate buffer solution (pH = 4.5, 50 mL) at the initial potential of -1.0 V vs SCE with 2-GCE and 2/graphene-GCE as working electrodes, respectively.

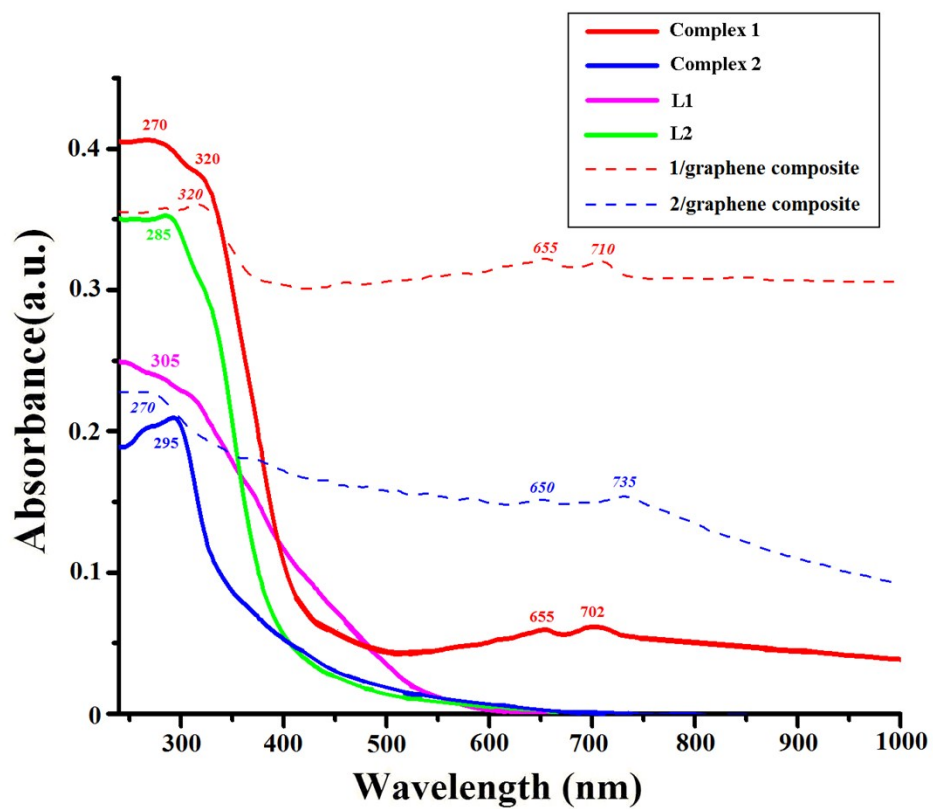

**Fig. S13** UV-Vis absorption spectra at room temperature for the free ligands **L1**, **L2**, complexes **1-2** and their graphene composite materials.

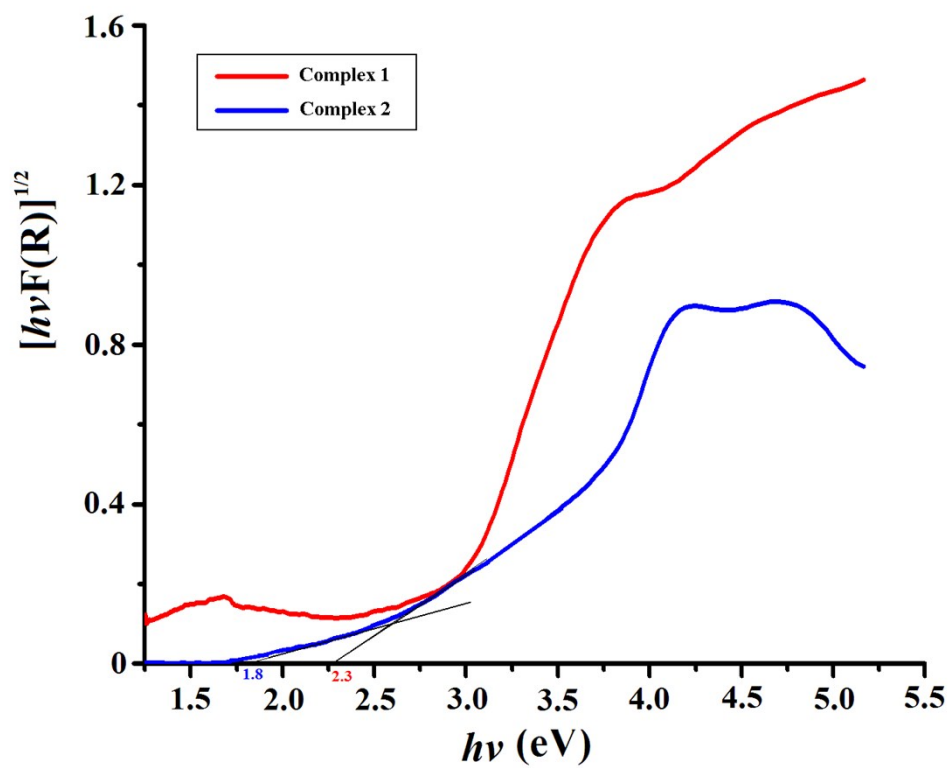

**Fig. S14** The diffuse reflectance spectra for complexes **1** and **2** in Kubelka–Munk functions.

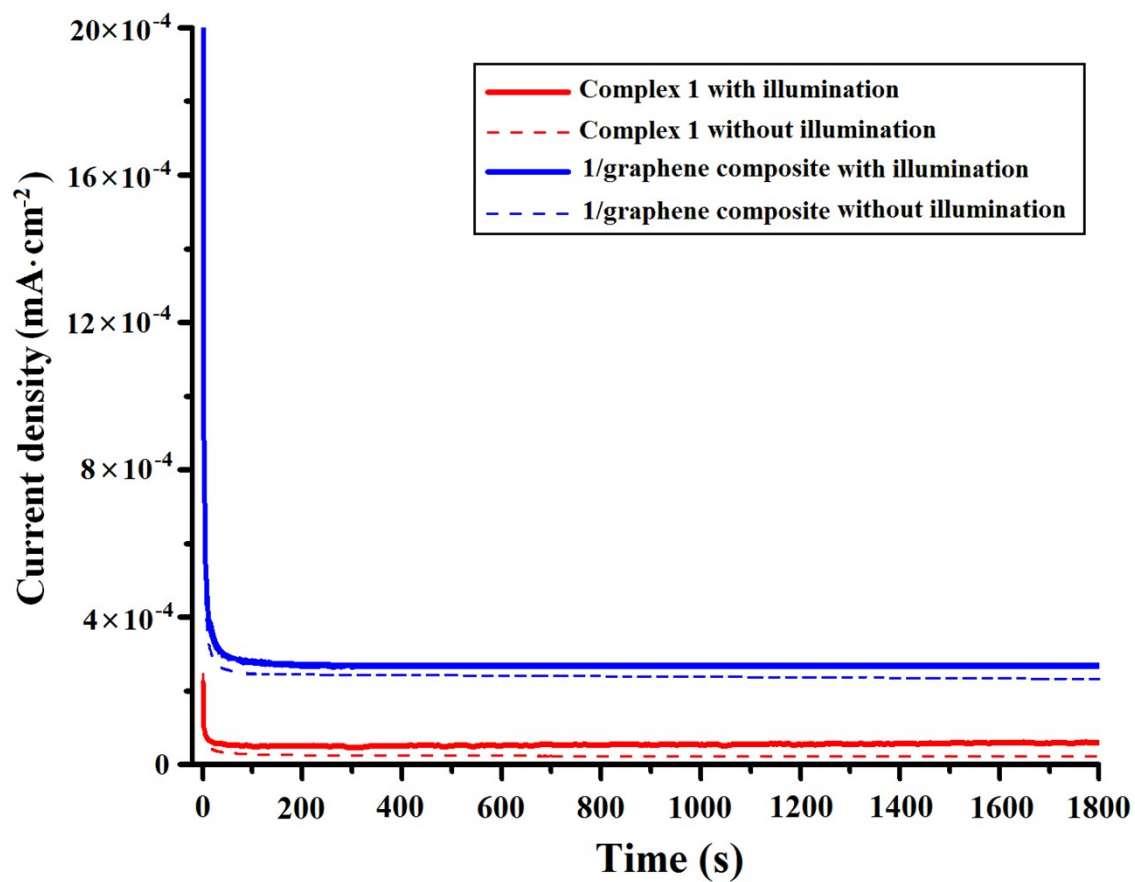

**Fig. S15** Current-time curves for complex 1- and 1/graphene composite-modified FTO electrodes in the absence (dotted lines) and presence of visible light illumination (solid lines) ( $650 \text{ nm} > \lambda > 350 \text{ nm}$ ) at  $100 \text{ mW} \cdot \text{cm}^{-2}$  with the open circuit potential of 0V vs Ag/AgCl was applied to the electrodes.

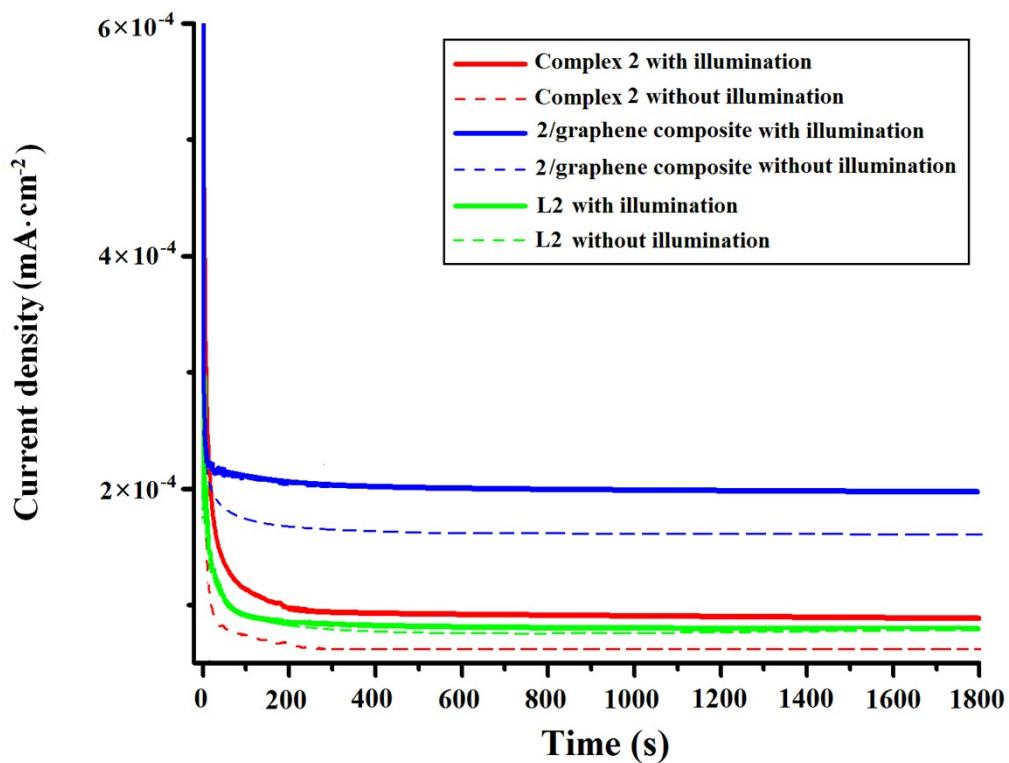

**Fig. S16** Current-time curves for L2-, complex 2- and 2/grapheme composite-modified FTO electrodes in the absence (dotted lines) and presence of visible light illumination (solid lines) ( $650\text{ nm} > \lambda > 350\text{ nm}$ ) at  $110\text{ mW}\cdot\text{cm}^{-2}$  with the open circuit potential of 0V vs Ag/AgCl was applied to the electrodes.

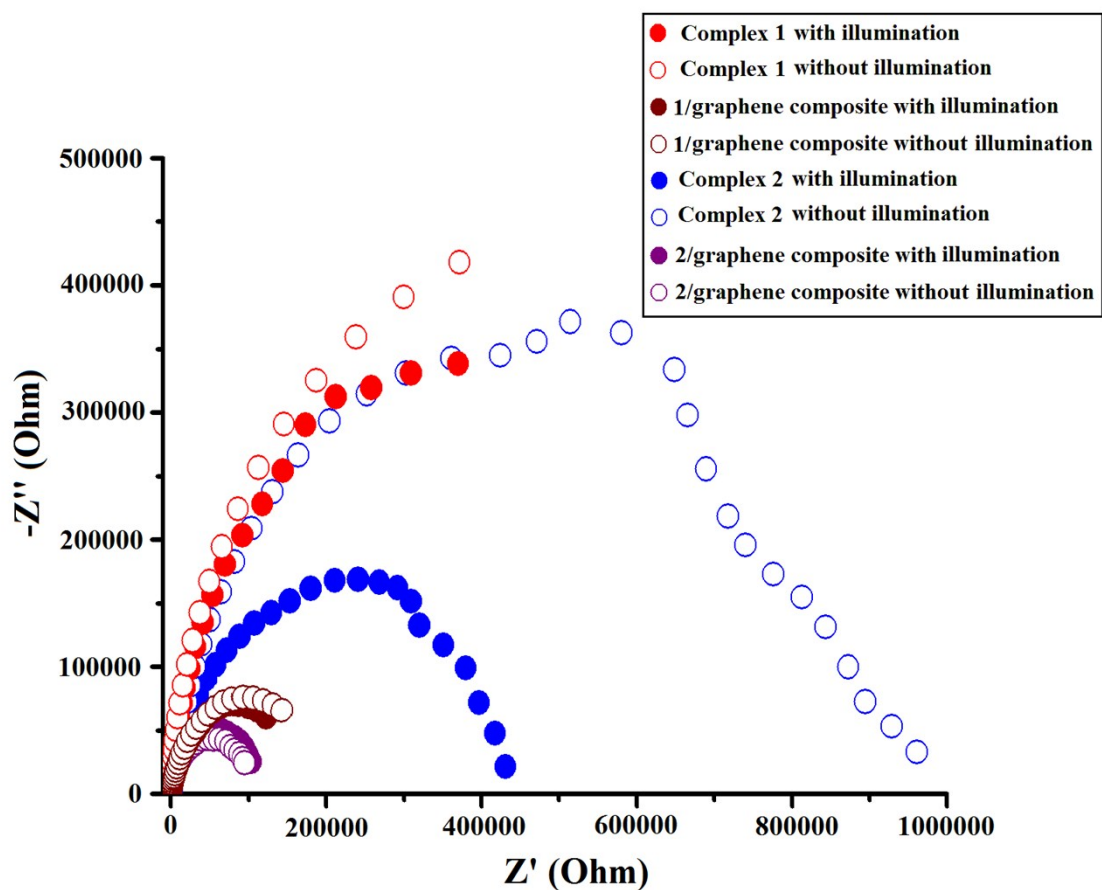

**Fig. S17** Nyquist plots ( $Z'$  vs.  $-Z''$ ) of the three-electrode systems at  $E = 0$  V vs Ag/AgCl in acetic acid- sodium acetate buffer solution (0.4 M, pH = 4.5, 50 mL) in the absence and presence of visible light illumination ( $650 \text{ nm} > \lambda > 350 \text{ nm}$ ) with the complexes- and their graphene composites-modified FTO slides as working electrodes, respectively.

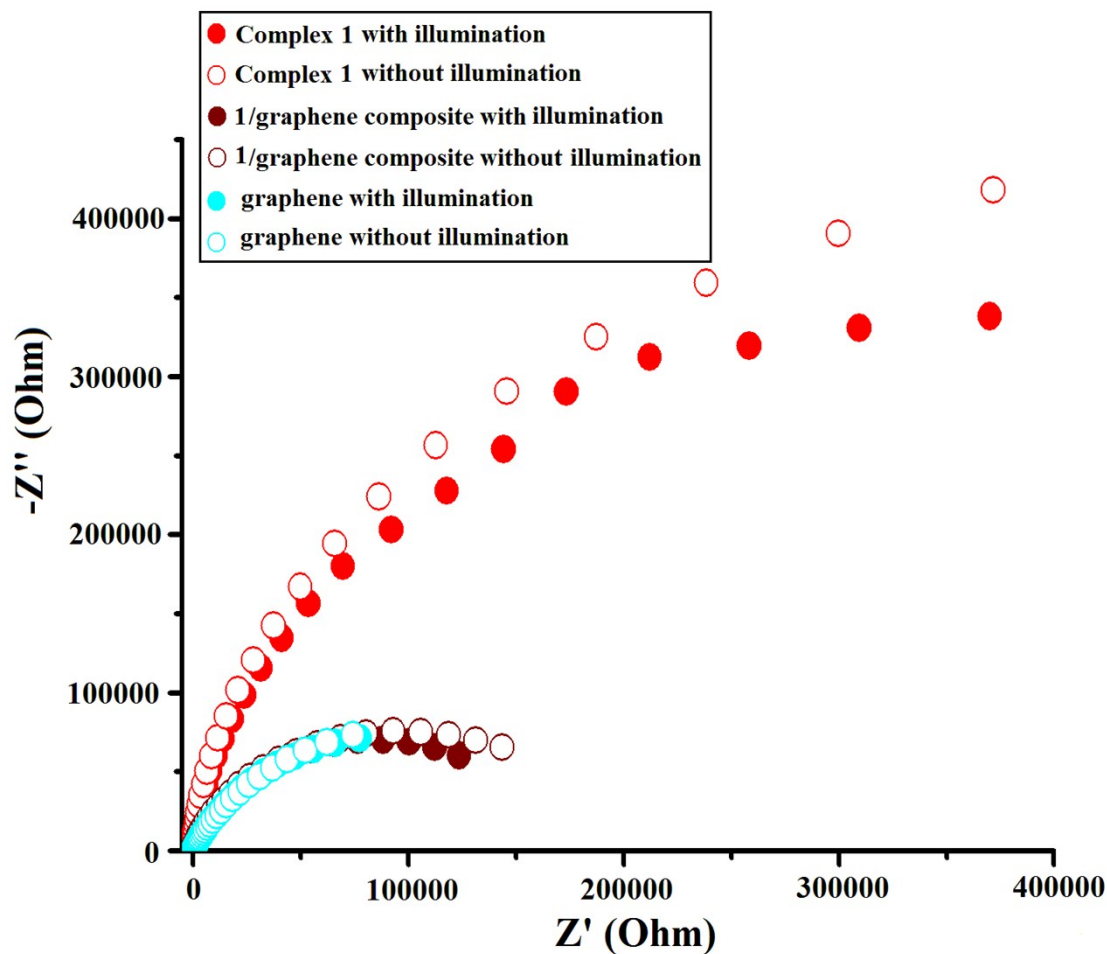

**Fig. S18** Nyquist plots ( $Z'$  vs.  $-Z''$ ) of the three-electrode systems at  $E = 0$  V vs Ag/AgCl in acetic acid- sodium acetate buffer solution (0.4 M, pH = 4.5, 50 mL) in the absence and presence of visible light illumination ( $650 \text{ nm} > \lambda > 350 \text{ nm}$ ) with graphene-, **1**- and **1**/graphene composite- modified FTO slides as working electrodes, respectively.

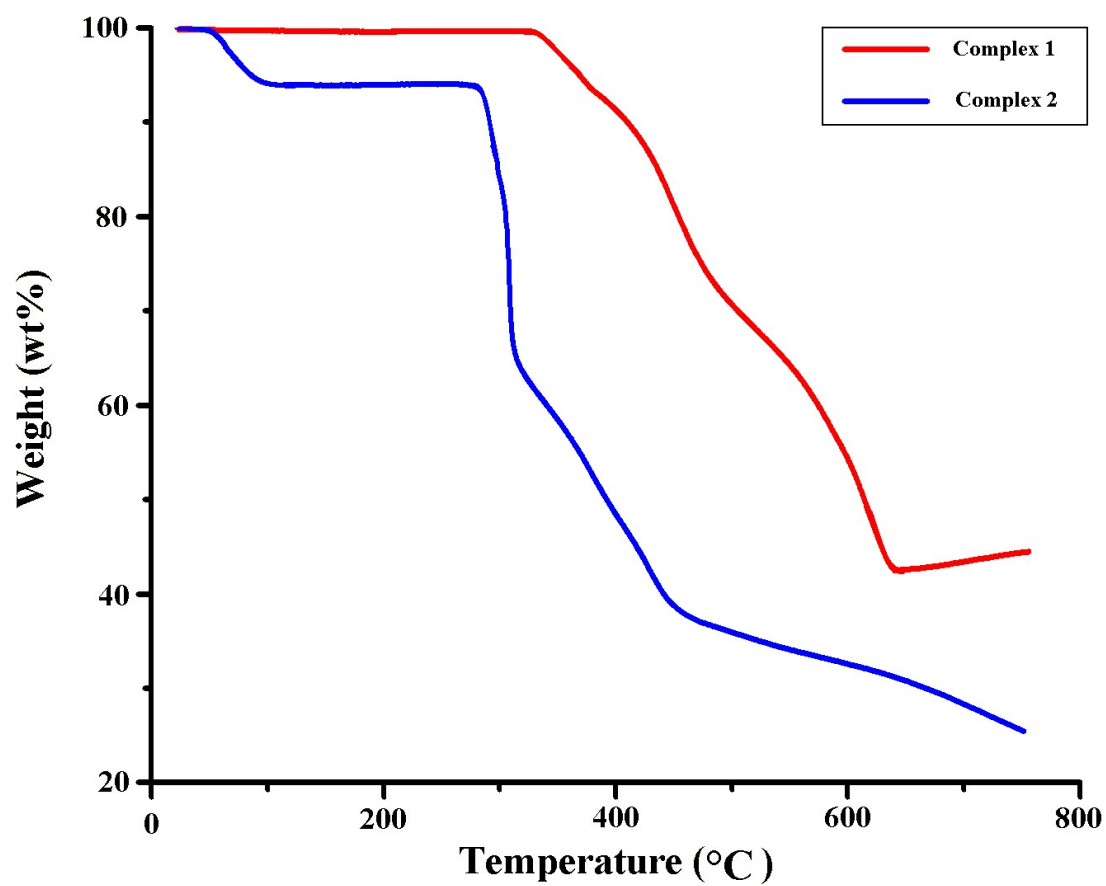

**Fig. S19** Thermogravimetric curves of complexes **1** (red) and **2** (blue).
